# Supplementary material for: Compilation of the Antimicrobial Compounds Produced by Burkholderia Sensu Stricto
Source: MDPI journal article supplement (doi:10.3390/molecules28041646), 2023-02-08
Supplement: s1 [file s1]

**Table S1.** Antimicrobial compounds produced by *Burkholderia sensu stricto*.

| Compound (s) number(s)           | Compounds            | Producing species                                                                            | Target organisms                                                                                                                                                                                                                                                                                                                                                                                                                                                                                                                                                                                        | Other asignation                     | Activity value (MIC, IC50, volume, amount, hemolytic units, µg/mL per agar well or per disc, etc.) | Mode of action                                                                                                                                                                                                                                                          | Reference     |
|----------------------------------|----------------------|----------------------------------------------------------------------------------------------|---------------------------------------------------------------------------------------------------------------------------------------------------------------------------------------------------------------------------------------------------------------------------------------------------------------------------------------------------------------------------------------------------------------------------------------------------------------------------------------------------------------------------------------------------------------------------------------------------------|--------------------------------------|----------------------------------------------------------------------------------------------------|-------------------------------------------------------------------------------------------------------------------------------------------------------------------------------------------------------------------------------------------------------------------------|---------------|
| <b>N-CONTAINING HETEROCYCLES</b> |                      |                                                                                              |                                                                                                                                                                                                                                                                                                                                                                                                                                                                                                                                                                                                         |                                      |                                                                                                    |                                                                                                                                                                                                                                                                         |               |
| <b>Pyrazine-derived</b>          |                      |                                                                                              |                                                                                                                                                                                                                                                                                                                                                                                                                                                                                                                                                                                                         |                                      |                                                                                                    |                                                                                                                                                                                                                                                                         |               |
| 1                                | PPDH                 |                                                                                              |                                                                                                                                                                                                                                                                                                                                                                                                                                                                                                                                                                                                         |                                      |                                                                                                    | Cell wall/membrane/envelope biogenesis, signal transduction mechanisms, inorganic ion transport and metabolism, secondary metabolites biosynthesis, transport and catabolism, post-translational modification, protein turnover and amino acid transport and metabolism |               |
| 2                                | PPDHMP               | <i>Burkholderia seminalis</i> JRBHU6                                                         | <i>Fusarium oxysporum</i> , <i>Aspergillus niger</i> , <i>Microsporium gypseum</i> , <i>Trichophyton mentaphyites</i> , <i>Trichoderma harzianum</i> and the bacteria <i>Staphylococcus aureus</i> , <i>Pseudomonas aeruginosa</i> , <i>Escherichia coli</i> , <i>Shigella boydii</i> , <i>Klebsiella pneumoniae</i>                                                                                                                                                                                                                                                                                    | VOC                                  | MIC: 50 µg/ml of crude methanolic extract                                                          |                                                                                                                                                                                                                                                                         | [21]          |
| <b>Iminomyrrolidines</b>         |                      |                                                                                              |                                                                                                                                                                                                                                                                                                                                                                                                                                                                                                                                                                                                         |                                      |                                                                                                    |                                                                                                                                                                                                                                                                         |               |
| 3                                | v-pyrrolidine        | <i>Burkholderia plantarii</i>                                                                |                                                                                                                                                                                                                                                                                                                                                                                                                                                                                                                                                                                                         |                                      | 1 µg                                                                                               |                                                                                                                                                                                                                                                                         |               |
| 4                                | t-pyrrolidine        | 9424                                                                                         | <i>Erwinia amylovora</i>                                                                                                                                                                                                                                                                                                                                                                                                                                                                                                                                                                                |                                      | 1 µg                                                                                               |                                                                                                                                                                                                                                                                         | [23]          |
| 5                                | Pyrazole             | <i>Burkholderia glumae</i> 3729, 8657                                                        | <i>Erwinia amylovora</i> , <i>Pectobacterium carotovorum</i> , <i>Pectobacterium carotovorum</i> pv atroseptica, <i>Pseudomonas syringae</i> pv carotovorum, <i>Pseudomonas syringae</i> syringae, <i>Xanthomonas campestris</i> pv pruni                                                                                                                                                                                                                                                                                                                                                               |                                      | 1 µg                                                                                               |                                                                                                                                                                                                                                                                         | [24]          |
| 6                                | Pyrrolnitrin         | <i>Burkholderia pyrrocinia</i> , <i>Burkholderia cepacia</i> , <i>Burkholderia ambifaria</i> | <i>Penicillium</i> , <i>Phytophthora capsici</i> , <i>Fusarium oxysporum</i> , <i>Rhizoctonia solani</i> , <i>Colletotrichum gloeosporioides</i> , <i>Sclerotinia sclerotiorum</i> , <i>Candida albicans</i> , <i>Hansenula anomala</i> , <i>Saccharomyces cerevisiae</i> , <i>Bacillus</i> , <i>Streptomyces</i>                                                                                                                                                                                                                                                                                       | Halometabolite                       | MIC: 2-200 µg.mL <sup>-1</sup> / 30-250 µg/disc                                                    | Inhibitory effect on the electron transport system.                                                                                                                                                                                                                     | [28,29,30,31] |
| 7                                | Phenazine            | <i>Burkholderia cepacia</i> 5.5B                                                             | <i>Rhizoctonia solani</i>                                                                                                                                                                                                                                                                                                                                                                                                                                                                                                                                                                               | Involved in biofilm formation by Bcc | 10 mg                                                                                              |                                                                                                                                                                                                                                                                         | [33,34]       |
| 8                                | Phencomycin          |                                                                                              | <i>Botrytis cinerea</i> , <i>Colletotrichum orbiculare</i> , <i>Diaporthe citri</i> , <i>Magnaporthe oryzae</i> , <i>Saccharomyces cerevisiae</i> , <i>Bacillus megaterium</i> , <i>Micrococcus luteus</i> , <i>Xanthomonas campestris</i>                                                                                                                                                                                                                                                                                                                                                              | Phenazin with two substituents       | MIC: 32-128 µg.mL <sup>-1</sup>                                                                    |                                                                                                                                                                                                                                                                         |               |
| 9                                | Hydroxyphencomycin   |                                                                                              | <i>Bacillus megaterium</i>                                                                                                                                                                                                                                                                                                                                                                                                                                                                                                                                                                              | Phencomycin derivative               | MIC: 128 µg.mL <sup>-1</sup>                                                                       |                                                                                                                                                                                                                                                                         |               |
| 10                               | Dihydroxyphencomycin | <i>Burkholderia glumae</i> 411gr-6                                                           | <i>Alternaria brassicicola</i> , <i>Aspergillus oryzae</i> , <i>Botrytis cinerea</i> , <i>Cladosporium cucumerinum</i> , <i>Colletotrichum gloeosporioides</i> , <i>Colletotrichum orbiculare</i> , <i>Cylindrocarpon destructans</i> , <i>Diaporthe citri</i> , <i>Fusarium oxysporum</i> , <i>Magnaporthe oryzae</i> , <i>Phytophthora capsici</i> , <i>Rhizopus stolonifer</i> , <i>Sclerotinia sclerotiorum</i> , <i>Candida albicans</i> , <i>Saccharomyces cerevisiae</i> , <i>Escherichia coli</i> , <i>Pseudomonas syringae</i> , <i>Ralstonia solanacearum</i> , <i>Xanthomonas campestris</i> | Phencomycin derivate                 | MIC: 1-128 µg.mL <sup>-1</sup>                                                                     |                                                                                                                                                                                                                                                                         | [35]          |
| 11                               | PCA                  | <i>Burkholderia</i> sp. HQB-1                                                                | <i>Fusarium oxysporum</i> , <i>Colletotrichum gloeosporioides</i> , <i>Botrytis cinerea</i> , <i>Curvularia fallax</i>                                                                                                                                                                                                                                                                                                                                                                                                                                                                                  | Phenazine derivate                   | MIC: 1.56-6.12 µg.mL <sup>-1</sup>                                                                 |                                                                                                                                                                                                                                                                         | [36]          |
| 12                               | Indole               | <i>Burkholderia cenocepacia</i> ETR-B22                                                      | <i>Alternaria alternata</i> , <i>Aspergillus niger</i> , <i>Bipolaris sorokiniana</i> , <i>Botrytis cinerea</i> , <i>Fusarium solani</i> , <i>F. oxysporum</i> , <i>Fusarium fujikuroi</i> , <i>Helminthosporium torulosum</i> , <i>Mycosphaerella fijensis</i> , <i>Magnaporthe oryzae</i> , <i>Phyllosticta zingiberi</i> , <i>R. solani</i>                                                                                                                                                                                                                                                          | VOC                                  | 50 µL/petri dish                                                                                   | Inhibition of mycelial growth                                                                                                                                                                                                                                           | [37]          |
| 13                               | Pityriacitrin        | <i>Burkholderia</i> sp. NBF227                                                               | Cytotoxic activity against cancer lines                                                                                                                                                                                                                                                                                                                                                                                                                                                                                                                                                                 | β-carboline alkaloid                 | IC <sub>50</sub> : 75.79 µM                                                                        | Cytotoxic activity against cancer lines                                                                                                                                                                                                                                 | [38]          |

|                                   |                                     |                                                                                                                                                                                                               |                                                                                                                                                                                                                                                                                                                                                              |                             |                                        |                                                                                                    |         |
|-----------------------------------|-------------------------------------|---------------------------------------------------------------------------------------------------------------------------------------------------------------------------------------------------------------|--------------------------------------------------------------------------------------------------------------------------------------------------------------------------------------------------------------------------------------------------------------------------------------------------------------------------------------------------------------|-----------------------------|----------------------------------------|----------------------------------------------------------------------------------------------------|---------|
| 14                                | Pityriacitrin B                     | <i>Burkholderia</i> sp. NBF227                                                                                                                                                                                | Cytotoxic activity against cancer lines                                                                                                                                                                                                                                                                                                                      | $\beta$ -carboline alkaloid | IC <sub>50</sub> : 41.88-67.69 $\mu$ M | Cytotoxic activity against cancer lines                                                            | [38]    |
| <b>VOLATILE ORGANIC COMPOUNDS</b> |                                     |                                                                                                                                                                                                               |                                                                                                                                                                                                                                                                                                                                                              |                             |                                        |                                                                                                    |         |
| 15                                | Methyl anthranilate                 |                                                                                                                                                                                                               | <i>Alternaria alternata</i> , <i>Aspergillus niger</i> , <i>Bipolaris sorokiniana</i> , <i>Botrytis cinerea</i> , <i>Fusarium solani</i> , <i>Fusarium oxysporum</i> , <i>Fusarium fujikuroi</i> , <i>Helminthosporium torulosum</i> , <i>Mycosphaerella fijiensis</i> , <i>Magnaporthe oryzae</i> , <i>Phyllosticta zingiberi</i> , <i>Ralstonia solani</i> |                             |                                        |                                                                                                    |         |
| 16                                | Methyl salicylate                   |                                                                                                                                                                                                               | <i>Alternaria alternata</i> , <i>Aspergillus niger</i> , <i>Bipolaris sorokiniana</i> , <i>Botrytis cinerea</i> , <i>Fusarium fujikuroi</i> , <i>Helminthosporium torulosum</i> , <i>Mycosphaerella fijiensis</i> , <i>Magnaporthe oryzae</i> , <i>Phyllosticta zingiberi</i> , <i>Rhizoctonia solani</i>                                                    |                             |                                        |                                                                                                    |         |
| 17                                | Methyl benzoate                     |                                                                                                                                                                                                               | <i>Aspergillus niger</i> , <i>Rhizoctonia solani</i>                                                                                                                                                                                                                                                                                                         |                             |                                        |                                                                                                    |         |
| 18                                | Benzyl propionate                   |                                                                                                                                                                                                               | <i>Alternaria alternata</i> , <i>Aspergillus niger</i> , <i>Bipolaris sorokiniana</i> , <i>Botrytis cinerea</i> , <i>Fusarium solani</i> , <i>Fusarium oxysporum</i> , <i>Fusarium fujikuroi</i> , <i>Helminthosporium torulosum</i> , <i>Mycosphaerella fijiensis</i> , <i>Magnaporthe oryzae</i> , <i>Phyllosticta zingiberi</i> , <i>Ralstonia solani</i> |                             |                                        |                                                                                                    |         |
| 19                                | Benzyl acetate                      |                                                                                                                                                                                                               | <i>Alternaria alternata</i> , <i>Aspergillus niger</i> , <i>Bipolaris sorokiniana</i> , <i>Botrytis cinerea</i> , <i>Fusarium solani</i> , <i>Fusarium oxysporum</i> , <i>Fusarium fujikuroi</i> , <i>Helminthosporium torulosum</i> , <i>Mycosphaerella fijiensis</i> , <i>Magnaporthe oryzae</i> , <i>Phyllosticta zingiberi</i> , <i>Ralstonia solani</i> |                             |                                        |                                                                                                    |         |
| 20                                | 3,5-Di- <i>tert</i> -butylphenol    |                                                                                                                                                                                                               | <i>Alternaria alternata</i> , <i>Aspergillus niger</i> , <i>Bipolaris sorokiniana</i> , <i>Botrytis cinerea</i> , <i>Fusarium solani</i> , <i>Fusarium oxysporum</i> , <i>Fusarium fujikuroi</i> , <i>Helminthosporium torulosum</i> , <i>Mycosphaerella fijiensis</i> , <i>Magnaporthe oryzae</i> , <i>Phyllosticta zingiberi</i> , <i>Ralstonia solani</i> |                             |                                        |                                                                                                    |         |
| 21                                | Allyl benzyl ether                  |                                                                                                                                                                                                               | <i>Aspergillus niger</i> , <i>Rhizoctonia solani</i>                                                                                                                                                                                                                                                                                                         |                             |                                        |                                                                                                    |         |
| 22                                | Benzyl benzoate                     | <i>Burkholderia cenocepacia</i> ETR-B22                                                                                                                                                                       | <i>Aspergillus niger</i> , <i>Rhizoctonia solani</i>                                                                                                                                                                                                                                                                                                         |                             | 50 $\mu$ L/petri dish                  | Inhibition of mycelial growth                                                                      | [37]    |
| 23                                | Dimethyl trisulfide                 |                                                                                                                                                                                                               | <i>Alternaria alternata</i> , <i>Aspergillus niger</i> , <i>Bipolaris sorokiniana</i> , <i>Botrytis cinerea</i> , <i>Fusarium solani</i> , <i>Fusarium oxysporum</i> , <i>Fusarium fujikuroi</i> , <i>Helminthosporium torulosum</i> , <i>Mycosphaerella fijiensis</i> , <i>Magnaporthe oryzae</i> , <i>Phyllosticta zingiberi</i> , <i>Ralstonia solani</i> |                             |                                        |                                                                                                    |         |
| 24                                | Nonanoic acid                       |                                                                                                                                                                                                               | <i>Alternaria alternata</i> , <i>Aspergillus niger</i> , <i>Bipolaris sorokiniana</i> , <i>Botrytis cinerea</i> , <i>Fusarium solani</i> , <i>Fusarium oxysporum</i> , <i>Fusarium fujikuroi</i> , <i>Helminthosporium torulosum</i> , <i>Mycosphaerella fijiensis</i> , <i>Magnaporthe oryzae</i> , <i>Phyllosticta zingiberi</i> , <i>Ralstonia solani</i> |                             |                                        |                                                                                                    |         |
| 25                                | 2-pentadecanone                     |                                                                                                                                                                                                               | <i>Bipolaris sorokiniana</i> , <i>Rhizoctonia solani</i>                                                                                                                                                                                                                                                                                                     |                             |                                        |                                                                                                    |         |
| 26                                | 3-hexen-1-ol, benzoate, (Z)-        |                                                                                                                                                                                                               | <i>Alternaria alternata</i> , <i>Botrytis cinerea</i> , <i>Magnaporthe oryzae</i>                                                                                                                                                                                                                                                                            |                             |                                        |                                                                                                    |         |
| 27                                | Dimethyl disulfide                  | <i>Burkholderia gladioli</i> BBB-01                                                                                                                                                                           | <i>Magnaporthe oryzae</i> , <i>Gibberella fujikuroi</i> , <i>Sarocladium oryzae</i> , <i>Phellinus noxius</i> and <i>Colletotrichum fructicola</i> , <i>Candida albicans</i>                                                                                                                                                                                 |                             | 1-100 $\mu$ L                          |                                                                                                    | [40]    |
| 28                                | 2,5-dimethylfuran                   |                                                                                                                                                                                                               |                                                                                                                                                                                                                                                                                                                                                              |                             |                                        |                                                                                                    |         |
| <b>POLYENES</b>                   |                                     |                                                                                                                                                                                                               |                                                                                                                                                                                                                                                                                                                                                              |                             |                                        |                                                                                                    |         |
|                                   | Polyene                             | <i>Burkholderia cenocepacia</i> P525                                                                                                                                                                          | <i>Enterobacter soli</i> , <i>Enterobacter aerogenes</i>                                                                                                                                                                                                                                                                                                     | Oxidizer                    | 50 $\mu$ L                             | Bacteriostatic effect by extending the lag phase of growth                                         | [41]    |
| 29                                | Thailandamide A                     |                                                                                                                                                                                                               | <i>Bacillus subtilis</i> , <i>Staphylococcus aureus</i> , <i>Neisseria gonorrhoeae</i> , <i>Escherichia coli</i> , <i>Vibrio parahaemolyticus</i> , <i>Klebsiella pneumoniae</i> , <i>Acinetobacter baumannii</i> , <i>Saccharomyces cerevisiae</i>                                                                                                          |                             | MIC: 1-50 $\mu$ M                      | Inhibition of the first step of fatty acid biosynthesis by targeting acetyl-CoA carboxylase (AccA) | [42]    |
| 30                                | Thailandenes A                      | <i>Burkholderia thailandensis</i> DW503                                                                                                                                                                       | <i>Staphylococcus aureus</i> , <i>Bacillus subtilis</i> , <i>Saccharomyces cerevisiae</i>                                                                                                                                                                                                                                                                    |                             | IC <sub>50</sub> : 7.9-10.8 $\mu$ M    | Induces oxidative stress in sensitive cells, and formation of reactive oxygen species*             | [43]    |
| 31                                | Thailandenes B                      |                                                                                                                                                                                                               | <i>Staphylococcus aureus</i> , <i>Saccharomyces cerevisiae</i>                                                                                                                                                                                                                                                                                               |                             | IC <sub>50</sub> 4-9 $\mu$ M           |                                                                                                    |         |
| 32                                | Thailandenes C                      |                                                                                                                                                                                                               |                                                                                                                                                                                                                                                                                                                                                              |                             |                                        |                                                                                                    |         |
| 33, 34                            | Enacyloxin IIa, iso-enacyloxina IIa | <i>Burkholderia ambifaria</i> AMMD <sup>T</sup> , <i>Burkholderia gladioli</i> pv. <i>cocovenensis</i> ATCC 33664 <sup>T</sup> , <i>Burkholderia gladioli</i> pv. <i>cocovenensis</i> ATCC 33664 <sup>T</sup> | <i>Burkholderia multivorans</i> , <i>Burkholderia dolosa</i> , <i>Acinetobacter baumannii</i>                                                                                                                                                                                                                                                                | PK                          | MIC: 3-15 mg.L <sup>-1</sup>           | Inhibit protein biosynthesis by binding to ribosomal elongation factor Tu                          | [44]    |
| 35                                | Enacyloxin IIIa                     |                                                                                                                                                                                                               | <i>Escherichia coli</i> , <i>Pseudomonas aeruginosa</i>                                                                                                                                                                                                                                                                                                      |                             | 50 $\mu$ g.mL <sup>-1</sup>            |                                                                                                    | [46]    |
| <b>POLYINES</b>                   |                                     |                                                                                                                                                                                                               |                                                                                                                                                                                                                                                                                                                                                              |                             |                                        |                                                                                                    |         |
| 36                                | Cepacin A                           | <i>Burkholderia cepacia</i> SC 11,783, <i>Burkholderia ambifaria</i> J82/BCC01 91, <i>Burkholderia ambifaria</i> M54/BCC0 316                                                                                 | <i>Staphylococcus aureus</i> , <i>Micrococcus luteus</i> , <i>Escherichia coli</i> , <i>Proteus vulgaris</i> , <i>Salmonella typhosa</i> , <i>Pythium ultimum</i>                                                                                                                                                                                            | Acetylenic antibiotic       | MIC: 0.1-25 $\mu$ g.mL <sup>-1</sup>   | Inhibition of protein synthesis by binding to the 50S ribosomal subunit                            | [47,48] |
| 37                                | Cepacin B                           | <i>Burkholderia cepacia</i> SC 11,783                                                                                                                                                                         | <i>Staphylococcus aureus</i> , <i>Microbacterium luteus</i> , <i>Escherichia coli</i> , <i>Klebsiella aerogenes</i> , <i>Proteus mirabilis</i> , <i>Proteus rettgeri</i> , <i>Proteus vulgaris</i> , <i>Salmonella typhi</i> , <i>Shigella sonnei</i> , <i>Enterobacter cloacae</i> , <i>Enterobacter aerogenes</i> , <i>Citrobacter freundii</i>            |                             | MIC: 0.05-25 $\mu$ g.mL <sup>-1</sup>  |                                                                                                    | [47]    |
| 38                                | Caryoynein A                        | <i>Burkholderia</i> sp.                                                                                                                                                                                       | <i>Staphylococcus aureus</i> , <i>Bacillus subtilis</i> , <i>Enterococcus faecalis</i> , <i>Escherichia coli</i>                                                                                                                                                                                                                                             | Fatty acid-derived          | MIC: 0.02-25 $\mu$ g.mL <sup>-1</sup>  |                                                                                                    | [50,51] |

|                      |                                              |                                                                                            |                                                                                                                                                                                                                                                                                                                                                                                                                                    |                |  |                                    |                                                                                                                                                                                            |
|----------------------|----------------------------------------------|--------------------------------------------------------------------------------------------|------------------------------------------------------------------------------------------------------------------------------------------------------------------------------------------------------------------------------------------------------------------------------------------------------------------------------------------------------------------------------------------------------------------------------------|----------------|--|------------------------------------|--------------------------------------------------------------------------------------------------------------------------------------------------------------------------------------------|
|                      |                                              | <i>caryophylli</i> ,<br><i>Burkholderia</i><br><i>a gladioli</i><br>Lv-StA                 | <i>Salmonella enteritidis</i> , <i>Klebsiella pneumoniae</i> , <i>Serratia marcescens</i> , <i>Proteus vulgaris</i> , <i>Shigella flexneri</i> , <i>Enterobacter cloacae</i> , <i>Pseudomonas aeruginosa</i> , <i>Tricophyton mentagrophytes</i> , <i>Tricophyton interdigitale</i> , <i>Tricophyton rubrum</i> , <i>Purpureocillium lilacinum</i>                                                                                 |                |  |                                    |                                                                                                                                                                                            |
| 39                   | Caryocine B                                  | <i>Burkholderia</i><br><i>a caryophylli</i>                                                | <i>Staphylococcus aureus</i> , <i>Bacillus subtilis</i> , <i>Enterococcus faecalis</i> , <i>Escherichia coli</i> , <i>Salmonella enteritidis</i> , <i>Klebsiella pneumoniae</i> , <i>Serratia marcescens</i> , <i>Proteus vulgaris</i> , <i>Shigella flexneri</i> , <i>Enterobacter cloacae</i> , <i>Pseudomonas aeruginosa</i> , <i>Tricophyton mentagrophytes</i> , <i>Tricophyton interdigitale</i> , <i>Tricophyton rubrum</i> |                |  | MIC: 0.02-0.63 µg.mL <sup>-1</sup> |                                                                                                                                                                                            |
| 40                   | Caryocine C                                  | <i>Burkholderia</i><br><i>a caryophylli</i>                                                | <i>Staphylococcus aureus</i> , <i>Bacillus subtilis</i> , <i>Enterococcus faecalis</i> , <i>Escherichia coli</i> , <i>Salmonella enteritidis</i> , <i>Klebsiella pneumoniae</i> , <i>Serratia marcescens</i> , <i>Proteus vulgaris</i> , <i>Shigella flexneri</i> , <i>Enterobacter cloacae</i> , <i>Pseudomonas aeruginosa</i> , <i>Tricophyton mentagrophytes</i> , <i>Tricophyton interdigitale</i> , <i>Tricophyton rubrum</i> |                |  |                                    |                                                                                                                                                                                            |
| <b>SIDEROPHORES</b>  |                                              |                                                                                            |                                                                                                                                                                                                                                                                                                                                                                                                                                    |                |  |                                    |                                                                                                                                                                                            |
| 41                   | Pyochelin                                    | " <i>Burkholderia paludis</i> ",<br><i>Burkholderia</i><br><i>a seminalis</i><br>TC3.4.2R3 | <i>Enterococcus faecalis</i> , <i>Staphylococcus aureus</i> , <i>Fusarium oxysporum</i>                                                                                                                                                                                                                                                                                                                                            | NRP            |  | MIC: 3.13-6.26 µg.mL <sup>-1</sup> | Production of intracellular reactive oxygen species leading to disrupt bacterial membrane [57,59]                                                                                          |
| 42                   | Cepabactin                                   | <i>Burkholderia</i><br><i>a cepacia</i><br>ATCC<br>25416 <sup>T</sup>                      | <i>Staphylococcus aureus</i> , <i>Staphylococcus epidermidis</i> , <i>Streptococcus faecalis</i> , <i>Bacillus subtilis</i> , <i>Bacillus anthracis</i> , <i>Escherichia coli</i> , <i>Salmonella Typhi</i> , <i>Salmonella Typhimurium</i> , <i>Klebsiella pneumoniae</i> , <i>Proteus vulgaris</i> , <i>Proteus mirabilis</i> , <i>Proteus rettgeri</i>                                                                          |                |  | MIC: 1.56-50 µg.mL <sup>-1</sup>   | [60,61,62]                                                                                                                                                                                 |
| 43                   | Ornibactin                                   | <i>Burkholderia</i><br><i>a contaminans</i><br>MS14                                        | <i>Xanthomonas citri</i> pv. <i>malvacearum</i> , <i>Pectobacterium carotovorum</i> subsp. <i>carotovorum</i> , <i>Ralstonia solanacearum</i> , <i>Pseudomonas syringae</i> pv. <i>syringae</i> , <i>Erwinia amylovora</i> , <i>Escherichia coli</i> , <i>Clavibacter michiganensis</i> subsp. <i>michiganensis</i> , <i>Bacillus megaterium</i>                                                                                   | NRP            |  | ND                                 | Promotes iron uptake in iron-deficient cells/protect the cells from metal toxicity and thus play an alternative role in metal homeostasis [65,151]                                         |
| <b>MACROLIDES</b>    |                                              |                                                                                            |                                                                                                                                                                                                                                                                                                                                                                                                                                    |                |  |                                    |                                                                                                                                                                                            |
| 44                   | Gladiolin                                    | <i>Burkholderia</i><br><i>a gladioli</i><br>BCC0238                                        | <i>Mycobacterium tuberculosis</i> , <i>Klebsiella pneumoniae</i> , <i>Acinetobacter baumannii</i> , <i>Pseudomonas aeruginosa</i> , <i>Enterobacter cloacae</i> , <i>Serratia plymuthica</i> , <i>Ralstonia mannitolilytica</i> , <i>Burkholderia multivorans</i> , <i>Escherichia coli</i> , <i>Enterococcus faecium</i> , <i>Staphylococcus aureus</i> , <i>Bacillus subtilis</i> , <i>Candida albicans</i>                      | PK             |  | MIC: 4-64 µg.mL <sup>-1</sup>      | Inhibition of RNA polymerase [68]                                                                                                                                                          |
| 45                   | Lagriene                                     | <i>Burkholderia</i><br><i>a gladioli</i><br>Lv-StA                                         | <i>Bacillus thuringiensis</i> , <i>Mycobacterium vaccae</i> , <i>Enterococcus faecalis</i> , <i>Staphylococcus aureus</i>                                                                                                                                                                                                                                                                                                          | PK             |  | 50 µg                              | Inhibition of RNA polymerase [51]                                                                                                                                                          |
| <b>BACTERIO CINS</b> |                                              |                                                                                            |                                                                                                                                                                                                                                                                                                                                                                                                                                    |                |  |                                    |                                                                                                                                                                                            |
|                      | Tailocin (BceTMilo)                          | <i>Burkholderia</i><br><i>a cenocepacia</i><br>BC0425                                      | Bcc strains, <i>Burkholderia gladioli</i> , <i>Burkholderia glumae</i>                                                                                                                                                                                                                                                                                                                                                             |                |  | Killing units: 3.86-12.30          | Inject ions through the cell membrane and disrupt the proton motive force. Interferes with the integration and folding of outer membrane proteins by recognition of BamA receptors [72,73] |
|                      | Lectin-like (LipA)                           | <i>Burkholderia</i><br><i>a orbicula</i><br>TAil-371 <sup>T</sup> ,<br>AU1054              | <i>Burkholderia ambifaria</i> , <i>Burkholderia anthina</i> , <i>Burkholderia cenocepacia</i> , <i>Burkholderia contaminans</i> , <i>Burkholderia metallica</i>                                                                                                                                                                                                                                                                    |                |  | 10 µg                              | Inhibition of RNA polymerase [66,73]                                                                                                                                                       |
|                      | Burkhocins M1 and M2                         | <i>Burkholderia</i><br><i>a ambifaria</i><br>MEX-5,<br>AMMD <sup>T</sup>                   | Bcc strains                                                                                                                                                                                                                                                                                                                                                                                                                        |                |  | 20 µM                              | Degradation of cell wall precursor lipid II in target cells [74]                                                                                                                           |
|                      | Bacteriocin-like inhibitory substance (BLIS) | <i>Burkholderia</i><br><i>a ubonensis</i><br>A21                                           | <i>Burkholderia pseudomallei</i>                                                                                                                                                                                                                                                                                                                                                                                                   | RiPP           |  | ND                                 | [75]                                                                                                                                                                                       |
|                      | Capistruin (lasso peptide)                   | <i>Burkholderia</i><br><i>a thailandensis</i><br>E264                                      | <i>Paraburkholderia caledonica</i> , <i>Escherichia coli</i> , <i>Pseudomonas aeruginosa</i>                                                                                                                                                                                                                                                                                                                                       |                |  | 5 nM                               | Inhibition of RNA polymerase [76,78]                                                                                                                                                       |
|                      | Ubonodin (lasso peptide)                     | <i>Burkholderia</i><br><i>a ubonensis</i><br>MSMB220<br>7                                  | <i>Burkholderia cepacia</i> , <i>Burkholderia multivorans</i> , <i>Escherichia coli</i>                                                                                                                                                                                                                                                                                                                                            |                |  | MIC: 3.9-40 µM                     | Inhibition of RNA polymerase [79]                                                                                                                                                          |
| <b>QUINOLONES</b>    |                                              |                                                                                            |                                                                                                                                                                                                                                                                                                                                                                                                                                    |                |  |                                    |                                                                                                                                                                                            |
| 46                   | HMNQ                                         | <i>Burkholderia</i><br><i>a thailandensis</i><br>E264                                      | <i>Bacillus subtilis</i> , <i>Escherichia coli</i>                                                                                                                                                                                                                                                                                                                                                                                 | Alkylquinolone |  | IC <sub>50</sub> : 0.3-1.1 µM      | Inhibition of pyrimidine biosynthesis. Inhibits the cytochrome <i>bc<sub>1</sub></i> complex of the electron transport chain of oxidative phosphorylation [82]                             |
| 47                   | HQNO                                         | <i>Burkholderia</i><br><i>a thailandensis</i><br>E264                                      | <i>Bacillus subtilis</i> , <i>Escherichia coli</i>                                                                                                                                                                                                                                                                                                                                                                                 | Alkylquinolone |  | IC <sub>50</sub> : 4.1-9.1 µM      | [82]                                                                                                                                                                                       |

|                        |                                              |                                                                                                 |                                                                                                                                                                                                                                                                                                                                                                                                                                                                                                                                                                                        |                      |                                                                                                                                                                                                                                |                                                                                                                                                                            |            |
|------------------------|----------------------------------------------|-------------------------------------------------------------------------------------------------|----------------------------------------------------------------------------------------------------------------------------------------------------------------------------------------------------------------------------------------------------------------------------------------------------------------------------------------------------------------------------------------------------------------------------------------------------------------------------------------------------------------------------------------------------------------------------------------|----------------------|--------------------------------------------------------------------------------------------------------------------------------------------------------------------------------------------------------------------------------|----------------------------------------------------------------------------------------------------------------------------------------------------------------------------|------------|
| 48                     | C7Δ2                                         | <i>Burkholderia cepacia</i> RB425, <i>Burkholderia cepacia</i> PC-II                            | <i>Verticillium dahlia</i> , <i>Pyricularia oryzae</i> , <i>Cochliobolus myyabeanus</i> , <i>Rhizoctonia solani</i> , <i>Fusarium oxysporum</i> , <i>Gaeumannomyces graminis</i> , <i>Corynebacterium michiganense</i> and oomycetes <i>P. capsici</i> , <i>Pythium ultimum</i> , <i>Fusarium oxysporum</i> , <i>Rhizoctonia solani</i>                                                                                                                                                                                                                                                | Alkylquinolone       | 0.1-10 <sup>1</sup> µg.mL <sup>-1</sup>                                                                                                                                                                                        | Inhibition of pyrimidine biosynthesis                                                                                                                                      | [84,85]    |
| 49                     | Burkholone                                   | <i>Burkholderia</i> sp. QN15488                                                                 | Induces cell death in 32D/GR15 cells in IGF-I containing medium                                                                                                                                                                                                                                                                                                                                                                                                                                                                                                                        | Quinolone derivative | IC <sub>50</sub> : 160 nM                                                                                                                                                                                                      |                                                                                                                                                                            | [86]       |
| OTHER NPR-PK COMPOUNDS |                                              |                                                                                                 |                                                                                                                                                                                                                                                                                                                                                                                                                                                                                                                                                                                        |                      |                                                                                                                                                                                                                                |                                                                                                                                                                            |            |
| 50                     | Gladiostatin                                 | <i>Burkholderia gladioli</i> BCC0238, BCC1622                                                   | <i>Saccharomyces cerevisiae</i> ; cancer cell lines such as ovarian, pancreatic and colon cancer, inhibits tumor cell migration                                                                                                                                                                                                                                                                                                                                                                                                                                                        | PK                   | <i>S. cerevisiae</i> MIC: 4 µg.mL <sup>-1</sup> ; cancer cell lines IC <sub>50</sub> : 0.24-1.4 µM                                                                                                                             | Inhibit eukaryotic translation by blocking the binding of tRNA to the E-site of the 60S ribosomal subunit and inhibit tumour cell-migration                                | [89]       |
| 50                     | Gladiofungin A                               | <i>Burkholderia gladioli</i> HK10739                                                            | <i>Penicillium notatum</i> , <i>Sprobolomyces salmonicolor</i> , <i>Purpureocillium lilacinum</i>                                                                                                                                                                                                                                                                                                                                                                                                                                                                                      | PK                   | 1-1000 µg.mL <sup>-1</sup>                                                                                                                                                                                                     | Inhibit eukaryotic translation by blocking the binding of tRNA to the E-site of the 60S ribosomal subunit and inhibit tumour cell-migration*                               | [88]       |
| 51                     | Glidobactin A                                | <i>Burkholderia pseudomallei</i> , <i>Burkholderia mallei</i>                                   |                                                                                                                                                                                                                                                                                                                                                                                                                                                                                                                                                                                        |                      | MIC: 1.6-50 µg.mL <sup>-1</sup>                                                                                                                                                                                                |                                                                                                                                                                            | [90]       |
| 52                     | Glidobactin B                                | <i>Schlegelleana brevitalea</i> K481-B101 (member of <i>Burkholderia</i> ales)                  | <i>Candida albicans</i> , <i>Cryptococcus neoformans</i> , <i>Aspergillus fumigatus</i> , <i>Aspergillus flavus</i> , <i>Trichophyton mentagrophytes</i> , <i>Blastomyces dermatitidis</i> , <i>Mucor spinosus</i>                                                                                                                                                                                                                                                                                                                                                                     |                      | MIC: 0.8-50 µgmL <sup>-1</sup>                                                                                                                                                                                                 | Inhibition of protein biosynthesis                                                                                                                                         | [90]       |
| 53                     | Glidobactin C                                | <i>Burkholderia pseudomallei</i>                                                                |                                                                                                                                                                                                                                                                                                                                                                                                                                                                                                                                                                                        | NRP-PK               | MIC: 0.2-50 µg.mL <sup>-1</sup>                                                                                                                                                                                                |                                                                                                                                                                            | [90,95]    |
| 54                     | Cepafungin I                                 | <i>Burkholderia cepacia</i> CB-3                                                                |                                                                                                                                                                                                                                                                                                                                                                                                                                                                                                                                                                                        |                      |                                                                                                                                                                                                                                | Prolongs the survival period of mice implanted with P388 murine lymphoid leukemia cells. However, the mechanism of action as an antifungal agents remains to be determined | [92]       |
| 54                     | Cepafungin II                                | <i>Burkholderia cepacia</i> CB-3, <i>Burkholderia pseudomallei</i> , <i>Burkholderia mallei</i> | <i>Candida albicans</i> , <i>Candida krusei</i> , <i>Aspergillus fumigatus</i> , <i>Microsporum canis</i> , <i>Trichophyton mentagrophytes</i>                                                                                                                                                                                                                                                                                                                                                                                                                                         |                      | MIC: 1.6-12.5 µg.mL <sup>-1</sup>                                                                                                                                                                                              |                                                                                                                                                                            | [92,93,94] |
| 55                     | Cepafungin III                               | <i>Burkholderia cepacia</i> CB-3                                                                |                                                                                                                                                                                                                                                                                                                                                                                                                                                                                                                                                                                        |                      |                                                                                                                                                                                                                                |                                                                                                                                                                            | [92]       |
| 56, 57, 58, 59         | Occidiofungin                                | <i>Burkholderia contaminans</i> MS14                                                            | <i>Alternaria</i> , <i>Aspergillus</i> , <i>Fusarium</i> , <i>Geotrichum</i> , <i>Macrophomina</i> , <i>Microsporum</i> , <i>Penicillium</i> , <i>Pythium</i> , <i>Rhizoctonia</i> , <i>Trichophyton</i> , several <i>Candida</i> species, <i>Cryptosporidium parvum</i>                                                                                                                                                                                                                                                                                                               | NRP-PK               | MIC: 0.5-32 µg.mL <sup>-1</sup> /<br><i>Cryptosporidium parvum</i> in vitro with limited cytotoxicity (50% effective concentration [EC <sub>50</sub> ]: 120 nM versus 50% cytotoxic concentration [TC <sub>50</sub> ]= 988 nM) | Disrupts fungal membrane morphology and induces apoptosis                                                                                                                  | [96,97,99] |
|                        |                                              | <i>Burkholderia pyrrocinia</i> Lyc2                                                             | <i>Aspergillus</i> , <i>Cladosporium</i> , <i>Cochliobolus heterostrophus</i> , <i>Colletotrichum acutatum</i> , <i>Gaeumannomyces graminis</i> , <i>Geotrichum candidum</i> , <i>Glomerella cingulate</i> , <i>Thielaviopsis basicola</i> , <i>Candida albicans</i> , <i>Candida glabrata</i> , <i>Cryptococcus neoformans</i> , <i>Saccharomyces cerevisiae</i> , <i>Aspergillus niger</i> , <i>Microsporum gypseum</i> , <i>Epidermophyton floccosum</i> , <i>Trichophyton mentagrophyte</i> , <i>Trichophyton rubrum</i> , <i>Fusarium oxysporum</i> , <i>Rhizopus stolonifera</i> |                      | ND                                                                                                                                                                                                                             |                                                                                                                                                                            | [101]      |
| 60, 61                 | Cepacidine A <sub>1</sub> and A <sub>2</sub> | <i>Burkholderia cepacia</i> AF 2001                                                             |                                                                                                                                                                                                                                                                                                                                                                                                                                                                                                                                                                                        | NRP-PK               | MIC: 0.013-0.391 µg.mL <sup>-1</sup>                                                                                                                                                                                           | Disrupts fungal membrane morphology and induces apoptosis                                                                                                                  | [103,104]  |

|                               |                         |                                                                                       |                                                                                                                                                                                                                                                                                                                                                                                                                                                                                                                                                 |                       |                                     |                                                                                              |           |
|-------------------------------|-------------------------|---------------------------------------------------------------------------------------|-------------------------------------------------------------------------------------------------------------------------------------------------------------------------------------------------------------------------------------------------------------------------------------------------------------------------------------------------------------------------------------------------------------------------------------------------------------------------------------------------------------------------------------------------|-----------------------|-------------------------------------|----------------------------------------------------------------------------------------------|-----------|
|                               | AFC-BC11                | <i>Burkholderia cepacia</i> BC11                                                      | <i>Rhizoctonia solani</i> , <i>Pythium ultimum</i> , <i>Colletotrichum</i> , <i>Helminthosporium maydis</i> , <i>Botrytis cinerea</i> , <i>Fusarium</i> , <i>Rhizopus stolonifer</i> , <i>Rhodotorula glutinis</i> , <i>Sclerotium rolfsii</i> , <i>Scopulariopsis brevicaulis</i>                                                                                                                                                                                                                                                              | NRP-PK                | MIC: 0.4-10.8 $\mu\text{g.mL}^{-1}$ | Binding to the phosphate groups of LPS of the outer and inner membrane                       | [107]     |
|                               |                         | <i>Burkholderia gladioli</i> HKI0739                                                  | <i>Bacillus thuringiensis</i> , <i>Paenibacillus larvae</i>                                                                                                                                                                                                                                                                                                                                                                                                                                                                                     | NRP                   | MIC: 3.1-12.5 $\mu\text{g.mL}^{-1}$ | Involved in inhibiting swarming                                                              | [108]     |
| 62                            | Icosalide A1            | <i>Burkholderia gladioli</i> BCC0238                                                  | <i>Candida albicans</i> , <i>Enterococcus faecium</i> , <i>Streptococcus pyogenes</i>                                                                                                                                                                                                                                                                                                                                                                                                                                                           | NRP                   | MIC: 8-16 $\mu\text{g.mL}^{-1}$     | Binding to the phosphate groups of LPS of the outer and inner membrane                       | [109]     |
| 63                            | Bactobolin A            |                                                                                       | <i>Bacillus cereus</i> , <i>Bacillus subtilis</i> , <i>Burkholderia cenocepacia</i> , <i>Paraburkholderia kururiensis</i> , <i>Burkholderia vietnamiensis</i> , <i>Chromobacterium violaceum</i> , <i>Escherichia coli</i> , <i>Flavobacterium johnsoniae</i> , <i>Klebsiella pneumoniae</i> , <i>Mycobacterium marinum</i> , <i>Pseudomonas aeruginosa</i> , <i>Pseudomonas fluorescens</i> , <i>Ralstonia pickettii</i> , <i>Salmonella enteria</i> serovar <i>Typhimurium</i> , <i>Staphylococcus aureus</i> , <i>Streptococcus pyogenes</i> |                       | MIC: 0.19-50 $\mu\text{g.mL}^{-1}$  |                                                                                              |           |
| 65                            | Bactobolin C            | <i>Burkholderia thailandensis</i>                                                     |                                                                                                                                                                                                                                                                                                                                                                                                                                                                                                                                                 | PK                    | MIC: 1.56-50 $\mu\text{g.mL}^{-1}$  | Inhibition of peptide chain elongation by binding to peptidyl transferase on the ribosome    | [111]     |
|                               | Xylocandins A1 and A2   | <i>Burkholderia cepacia</i> ATCC 3927                                                 | <i>Candida</i> species, <i>Trypophyton mentagrophytes</i> , <i>Trypophyton rubrum</i> , <i>Epidermophyton floccosum</i> , <i>Microsporium canis</i>                                                                                                                                                                                                                                                                                                                                                                                             | NRP-PK                | MIC: 0.05-0.4 $\mu\text{g.mL}^{-1}$ | Binding to the phosphate groups of LPS of the outer and inner membrane                       | [113]     |
| 67                            | Fragin                  | <i>Burkholderia cenocepacia</i> H111<br><i>Burkholderia pseudomallei</i> K96243       | <i>Fusarium solani</i> , <i>Bacillus cereus</i> , <i>Bacillus subtilis</i> , <i>Bacillus thuringiensis</i> , <i>Staphylococcus aureus</i> , <i>Saccharomyces cerevisiae</i>                                                                                                                                                                                                                                                                                                                                                                     | NRP                   | 20-80 $\mu\text{g}$                 |                                                                                              | [114]     |
| 68                            | BTH-II0204-207:A        | <i>Burkholderia thailandensis</i>                                                     | <i>Bacillus subtilis</i> , <i>Saccharomyces cerevisiae</i>                                                                                                                                                                                                                                                                                                                                                                                                                                                                                      | NRP                   | MIC: 11-33 $\mu\text{g.mL}^{-1}$    | Inhibition of type-4 phosphodiesterases (PDE4)                                               | [115]     |
| 69                            | Lagriamide              | <i>Burkholderia gladioli</i> Lv-StB                                                   | <i>Aspergillus niger</i> , <i>Purpureocillium lilacinum</i>                                                                                                                                                                                                                                                                                                                                                                                                                                                                                     | PK                    | 50 $\mu\text{g}$                    | Similar to bistramides                                                                       | [116]     |
| 70                            | Isosulfazecin           | <i>Burkholderia ubonensis</i>                                                         | <i>Salmonella enterica</i> serovar <i>Typhimurium</i> , <i>Escherichia coli</i> , <i>Proteus vulgaris</i> , <i>Proteus mirabilis</i> , <i>Serratia marcescens</i> , <i>Enterococcus faecalis</i> , <i>Bacillus subtilis</i>                                                                                                                                                                                                                                                                                                                     | NRP                   | MIC: 0.78-100 $\mu\text{g.mL}^{-1}$ | Inhibition of cell wall biosynthesis                                                         | [117,118] |
| 72,73                         | Spliceostatin           | <i>Burkholderia thailandensis</i> , <i>Burkholderia</i> sp. FERM BP-3421              | Potent cytotoxicity against tumor cell lines                                                                                                                                                                                                                                                                                                                                                                                                                                                                                                    | NRP-PK                | IC <sub>50</sub> : 0.11-950 nM      | Spliceosome inhibitor                                                                        | [124,125] |
|                               | Diketopiperazines       | <i>Burkholderia cepacia</i> CF-66, <i>Burkholderia cenocepacia</i> J2315 <sup>T</sup> | <i>Candida albicans</i>                                                                                                                                                                                                                                                                                                                                                                                                                                                                                                                         | NRP                   | 1 mL                                | Cyclic dipeptides                                                                            | [126,127] |
| OTHER ANTIMICROBIAL COMPOUNDS |                         |                                                                                       |                                                                                                                                                                                                                                                                                                                                                                                                                                                                                                                                                 |                       |                                     |                                                                                              |           |
| 74                            | Sinapiogladioside       | <i>Burkholderia gladioli</i> Lv-StA                                                   | <i>Purpureocillium lilacinum</i> , <i>Aspergillus fumigatus</i> , <i>Penicillium notatum</i>                                                                                                                                                                                                                                                                                                                                                                                                                                                    | Isothiocyanate moiety | 50 $\mu\text{g}$                    |                                                                                              | [51]      |
|                               | Compound 1              | <i>Burkholderia orbicola</i> TAtl-371 <sup>T</sup>                                    | <i>Tatumella terrestris</i> SHS 2008 <sup>T</sup>                                                                                                                                                                                                                                                                                                                                                                                                                                                                                               |                       | 10 $\mu\text{g}$                    |                                                                                              | [66]      |
| 75                            | Cepaciamide A           | <i>Burkholderia cepacia</i> D-202                                                     | <i>Botrytis cinerea</i>                                                                                                                                                                                                                                                                                                                                                                                                                                                                                                                         |                       | 100 ppm                             |                                                                                              | [130]     |
|                               | Bg_9562 protein         | <i>Burkholderia gladioli</i> NGJ1                                                     | <i>Saccharomyces cerevisiae</i> , <i>Candida albicans</i> , <i>Alternaria brassicae</i> , <i>Magnaporthe oryzae</i> , <i>Venturia inaequalis</i> , <i>Fusarium oxysporum</i> , <i>Alternaria</i> sp., <i>Dedymella</i> sp., <i>Phytophthora</i> sp., <i>Colletotrichum</i> sp., <i>Ascochyta rabiei</i> , <i>Neofusicoccum</i> sp.                                                                                                                                                                                                              | Prophage tail-like    | MIC: 15 $\mu\text{g.mL}^{-1}$       | Mycophagy, causes hyphal disintegration                                                      | [132]     |
| 76                            | MSSP2                   | <i>Burkholderia</i> sp.                                                               | <i>Pythium ultimum</i> , <i>Phytophthora capsici</i> and <i>Sclerotinia sclerotiorum</i>                                                                                                                                                                                                                                                                                                                                                                                                                                                        |                       | ED <sub>50</sub> : 35.7-54.9 ppm    |                                                                                              | [133]     |
|                               | Altericidins A, B and C | <i>Burkholderia cepacia</i> KB-1                                                      | <i>Alteraria kikuchiana</i> , <i>Ustilago maydis</i>                                                                                                                                                                                                                                                                                                                                                                                                                                                                                            | Peptide antibiotics   | 8-50 ppm                            | Inhibits the transport of precursors for the biosynthesis of the fungal cytoplasmic membrane | [134]     |
|                               | Bulgecins               | <i>Burkholderia</i> sp.                                                               | No antimicrobial activity/synergism with $\beta$ -lactam antibiotics                                                                                                                                                                                                                                                                                                                                                                                                                                                                            | Glycopeptide          | 1-1000 $\mu\text{g.mL}^{-1}$        | Induces bulge formation acting in                                                            | [119]     |

|                                                                                                                                                                |                                                  |                                                                                                                                                                                                                                                                           |                                                                                                                                                                                                                                                                                                                                                                                                                                                                                                                                                                                                                                                                                                                    |                    |                                                                                     |                                                                                                                                                                                                                                                                                                                                            |                   |
|----------------------------------------------------------------------------------------------------------------------------------------------------------------|--------------------------------------------------|---------------------------------------------------------------------------------------------------------------------------------------------------------------------------------------------------------------------------------------------------------------------------|--------------------------------------------------------------------------------------------------------------------------------------------------------------------------------------------------------------------------------------------------------------------------------------------------------------------------------------------------------------------------------------------------------------------------------------------------------------------------------------------------------------------------------------------------------------------------------------------------------------------------------------------------------------------------------------------------------------------|--------------------|-------------------------------------------------------------------------------------|--------------------------------------------------------------------------------------------------------------------------------------------------------------------------------------------------------------------------------------------------------------------------------------------------------------------------------------------|-------------------|
|                                                                                                                                                                |                                                  | <i>ubonensis</i><br>SB-72310                                                                                                                                                                                                                                              |                                                                                                                                                                                                                                                                                                                                                                                                                                                                                                                                                                                                                                                                                                                    |                    |                                                                                     | synergism with $\beta$ -lactamic antibiotics without binding to PBPs                                                                                                                                                                                                                                                                       |                   |
|                                                                                                                                                                | CF66I                                            | <i>Burkholderia cepacia</i> CF-66                                                                                                                                                                                                                                         | <i>Rhizoctonia solani</i> , <i>Fusarium graminearum</i> , <i>Fusarium moniliforme</i> , <i>Fusarium oxysporum</i> , <i>Fusarium sambucinum</i> , <i>Fusarium semitectum</i> , <i>Fusarium solani</i> , <i>Rosselinia necatrix</i> , <i>Aspergillus flavus</i> , <i>Aspergillus niger</i> , <i>Cochilobus carbonum</i> , <i>Botrytis cinerea</i> , <i>Mucor hiemolis</i> , <i>Penicillium chrysogenum</i> , <i>Rhizopus oryzae</i> , <i>Candida albicans</i> , <i>Cryptococcus meoformens</i> , <i>Pichia membranae</i> , <i>Saccharomyces cerevisiae</i> , <i>Alternaria alternata</i> , <i>Bipolaris sorokiniana</i> , <i>Colletotrichum lindemuthianum</i> , <i>Curvularia lunata</i> , <i>Monochaetia hirta</i> |                    | MIC: 2.5-29 $\mu\text{g.mL}^{-1}$                                                   | Reduced the extension rates of hyphae and induced changes in their morphology, forming multiple branches                                                                                                                                                                                                                                   | [120,152]         |
| 71                                                                                                                                                             | Malleonitrone                                    | <i>Burkholderia thailandensis</i> E264                                                                                                                                                                                                                                    | <i>Pseudomonas aeruginosa</i> , <i>Bacillus subtilis</i> , <i>Staphylococcus aureus</i> , <i>Enterococcus faecalis</i> , <i>Candida albicans</i>                                                                                                                                                                                                                                                                                                                                                                                                                                                                                                                                                                   | Nitrone conjugated | MIC: 10-22 $\mu\text{g.mL}^{-1}$                                                    | Active against the integrated QS molecule (IQS)                                                                                                                                                                                                                                                                                            | [123]             |
| RHAMNOLIPIDS                                                                                                                                                   |                                                  |                                                                                                                                                                                                                                                                           |                                                                                                                                                                                                                                                                                                                                                                                                                                                                                                                                                                                                                                                                                                                    |                    |                                                                                     |                                                                                                                                                                                                                                                                                                                                            |                   |
| 77                                                                                                                                                             | di-rhamnolipids C <sub>14</sub> -C <sub>14</sub> | <i>Burkholderia thailandensis</i> E264, <i>Burkholderia kururiensis</i> KP23, <i>B. glumae</i> AU6208, <i>Burkholderia pseudomallei</i> , <i>Burkholderia thailandensis</i> E264, <i>Burkholderia plantarii</i> DSM 9509 <sup>T</sup> , <i>Burkholderia glumae</i> AU6208 | <i>Streptococcus sanguinis</i> , <i>Streptococcus oralis</i> , <i>Neisseria mucosa</i> , <i>Actinomyces naeslundii</i> /Citotoxic effect on phagocytic (HL60) and nonphagocytic (HeLa) cell lines                                                                                                                                                                                                                                                                                                                                                                                                                                                                                                                  |                    | MIC: 0.15-1.25 $\text{mg.mL}^{-1}$ /Citotoxic effects: 20-80 hemolytic units        | Surface activity, wetting ability, detergency/ promote the uptake and biodegradation of poorly soluble substrates, act as immune modulators and virulence factors and are involved in surface motility and in bacterial biofilm development/ Induction of reactive oxygen species/ Tenoactive properties/ Cytotoxic and hemolytic activity | [136,137,139,140] |
| 78                                                                                                                                                             | di-rhamnolipids C <sub>12</sub> -C <sub>14</sub> | ND                                                                                                                                                                                                                                                                        | ND                                                                                                                                                                                                                                                                                                                                                                                                                                                                                                                                                                                                                                                                                                                 |                    | ND                                                                                  |                                                                                                                                                                                                                                                                                                                                            | [137,138]         |
| COMPOUNDS WITH DUAL EFFECT                                                                                                                                     |                                                  |                                                                                                                                                                                                                                                                           |                                                                                                                                                                                                                                                                                                                                                                                                                                                                                                                                                                                                                                                                                                                    |                    |                                                                                     |                                                                                                                                                                                                                                                                                                                                            |                   |
| 79, 80, 81, 82, 83                                                                                                                                             | Burkholdines                                     | <i>Burkholderia ambifaria</i> 2.2N                                                                                                                                                                                                                                        | <i>Saccharomyces cerevisiae</i> , <i>Candida albicans</i> , <i>Aspergillus niger</i> , hemolytic activity                                                                                                                                                                                                                                                                                                                                                                                                                                                                                                                                                                                                          | NRP-PK             | MIC: 0.1-31 $\mu\text{g.mL}^{-1}$ /Hemolytic activity: 4.5-37 $\mu\text{g.mL}^{-1}$ | Possible virulence factors                                                                                                                                                                                                                                                                                                                 | [141,142]         |
| 84                                                                                                                                                             | Tropolone                                        | <i>Burkholderia plantarii</i>                                                                                                                                                                                                                                             | <i>Penicillium oxalicum</i> , <i>Bacillus subtilis</i> , <i>Sarcina lutea</i> , <i>Saccharomyces pastorianus</i>                                                                                                                                                                                                                                                                                                                                                                                                                                                                                                                                                                                                   |                    |                                                                                     | Iron-quelating property<br>Hemolytic activity due to their interaction with erythrocyte membrane cholesterol                                                                                                                                                                                                                               | [143,144,145]     |
|                                                                                                                                                                | Cepalydin I and cepalydin II                     | <i>Burkholderia cepacia</i> JN106                                                                                                                                                                                                                                         | <i>Saccharomyces cerevisiae</i> , <i>Cryptococcus neoformans</i> , <i>Candida albicans</i>                                                                                                                                                                                                                                                                                                                                                                                                                                                                                                                                                                                                                         |                    | 5-100 hemolytic units                                                               |                                                                                                                                                                                                                                                                                                                                            | [146]             |
| VOC, volatile organic compound.<br>NRP, non-ribosomal peptide.<br>*Undetermined, however, the information was taken from other structurally related compounds. |                                                  |                                                                                                                                                                                                                                                                           |                                                                                                                                                                                                                                                                                                                                                                                                                                                                                                                                                                                                                                                                                                                    |                    |                                                                                     |                                                                                                                                                                                                                                                                                                                                            |                   |
